# Supplementary material for: An integrative methodology based on protein-protein interaction networks for identification and functional annotation of disease-relevant genes applied to channelopathies
Source: BMC Bioinformatics. 2019 Nov 12;20:565. doi: 10.1186/s12859-019-3162-1 (PMC6849233; doi:10.1186/s12859-019-3162-1)
Supplement: Supplementary file 5 — Additional file 5. Procedure and data extracted through the systematic review of the most relevant genes in channelopathies. Detailed procedure for the filtering and extraction of the relevant information of each gene and its diseases involved in channelopathies after the application of the systematic review. [file 12859_2019_3162_MOESM5_ESM.xlsx]

## Sheet: Additional file 2
PROCEDURE IN THE SYSTEMATIC REVIEW
DATABASE		scn1a	TERMINOLOGY	MESH CLASSIFICATION	scn2a	TERMINOLOGY	MESH CLASSIFICATION	scn4a	TERMINOLOGY	MESH CLASSIFICATION	scn4b	TERMINOLOGY	MESH CLASSIFICATION	scn5a	TERMINOLOGY	MESH CLASSIFICATION	scn9a	TERMINOLOGY	MESH CLASSIFICATION	kcnq2	TERMINOLOGY	MESH CLASSIFICATION	kcnh2	TERMINOLOGY	MESH CLASSIFICATION	ank3	TERMINOLOGY	MESH CLASSIFICATION
OMIM	GENE NAMES*	1			1			1			1			1			1			1			1			1	# different entries		TOTAL =	9
	n**=	9																											TOTAL =	9
	# diseases	4			2			5			2			9			8			3			3			1			TOTAL =	37
		GEFS+2	Generalized epilepsy with febrile seizures plus	Febrile seizures / generalized epilepsy	EIEE11	Early infantile epileptic encephalopathy	Infantile spasms (Generalized epilepsies / Epileptic syndromes)	HyperPP2	Hyperkalemic periodic paralysis	Musculoskeletal diseases / Neuromuscular diseases / Metabolic diseases	FAF17	Familial atrial fibrillation	Cardiac arrhythmias	FAF10	Familial atrial fibrillation	Cardiac arrhythmias	GEFS+7	Generalized epilepsy with febrile seizures plus	Febrile seizures / generalized epilepsy	EIEE7	Early infantile epileptic encephalopathy	Infantile spasms (Generalized epilepsies / Epileptic syndromes)	LQTS2		Cardiac arrhythmias / Cardiac conduction system disease	mental retardation		Neurobehavioral manifestations
		EIEE6 = Dravet = SMEI	Early infantile epileptic encephalopathy	Myoclonic epilepsies (Generalized epilepsies / Epileptic syndromes)	BFIS3	Benign Familial Infantile Seizures	Benign neonatal Epilepsy	HypoPP2	Hypokalemic periodic paralysis	Musculoskeletal diseases / Neuromuscular diseases / Metabolic diseases	LQTS10		Cardiac arrhythmias / Cardiac conduction system disease	BS1	Brugada Syndrome	Cardiac arrhythmias / Cardiac conduction system disease	erythermalgia primary		vascular diseases	myokymia		neurologic manifestations	SQTS1		Cardiac arrhythmias / Cardiac conduction system disease
		FFS3A	Familial febrile seziures	Febrile seizures				Congenital Myasthenic synrdrome16		Neuromuscular junction diseases				Cardiomyopathy dilated 1E		Cardiomyopathies	FFS3B	Familial Febrile seizures	febrile seizures	BNS1	Benign Neonatal Seizures	Benign neonatal epilepsy	susceptibility to LQTS2		Cardiac arrhythmias / Cardiac conduction system disease
		FHM3	Familial hemiplegic migraine	Headache disorders				Myotonia congenita atypical		Musculoskeletal diseases / Neurodegenerative diseases / Neuromuscular diseases				heart block nonprogressive		Cardiac arrhythmias / Cardiac conduction system disease	HSAN2D	Autosomal recessive congenital indifference to pain	peripheral nervous system diseases
								Paramyotonia congenita		Musculoskeletal diseases / Neuromuscular diseases				heart block progressive1A		Cardiac arrhythmias / Cardiac conduction system disease	insensitivity to pain		peripheral nervous system diseases
														LQTS3		Cardiac arrhythmias / Cardiac conduction system disease	paroxysmal extreme pain disorder		peripheral nervous system diseases
														Sick sinus syndrome1		Cardiac arrhythmias / Cardiac conduction system disease	small fiber neuropathy		peripheral nervous system diseases
														FVF1	Familial ventricular fibrillation	Cardiac arrhythmias	modifier of Dravet syndrome		Generalized epilepsy
														sudden death syndrome		Pathological processes
		scn1a			scn2a			scn4a			scn4b			scn5a			scn9a			kcnq2			kcnh2			ank3
Gene	GENE NAMES*	240			158			224			225			275			117			557			223			341			TOTAL =	2085	All these entries due to the different organisms which contain this gene.
	Homo sapiens	1			1			1			1			1			1			1			1			1			TOTAL =	9
	#diseases	4			3			6			1			8			6			2			2			1			TOTAL =	33	Phenotypes
		FHM3	Familial hemiplegic migraine	Headache disorders	BFNIS	Benign Familial Infantile Seizures	Benign neonatal Epilepsy	Congenital myasthenic syndrome, acetazolamide-responsive		Neuromuscular junction diseases	LQTS10		Cardiac arrhythmias / Cardiac conduction system disease	FAF10	Familial atrial fibrillation	Cardiac arrhythmias	GEFS+7	Generalized epilepsy with febrile seizures plus	Febrile seizures / generalized epilepsy	BFNS1	Benign Familial Neonatal Seizures	Benign neonatal epilepsy	LQTS2		Cardiac arrhythmias / Cardiac conduction system disease	Mental retardation, autosomal recessive 37			Neurobehavioral manifestations
		GEFS+1	Generalized epilepsy with febrile seizures plus	Febrile seizures / generalized epilepsy	EIEE11	Early infantile epileptic encephalopathy	Infantile spasms (Generalized epilepsies / Epileptic syndromes)	Hyperkalemic Periodic Paralysis Type 1		Musculoskeletal diseases / Neuromuscular diseases / Metabolic diseases				BS1	Brugada Syndrome	Cardiac arrhythmias / Cardiac conduction system disease	Hereditary sensory and autonomic neuropathy type IIA		Neurodegenerative diseases / Peripheral nervous system diseases	EIEE7	Early infantile epileptic encephalopathy	Infantile spasms (Generalized epilepsies / Epileptic syndromes)	SQTS1		Cardiac arrhythmias / Cardiac conduction system disease
		GEFS+2	Generalized epilepsy with febrile seizures plus	Febrile seizures / generalized epilepsy	GEFS+	Generalized epilepsy with febrile seizures plus	Febrile seizures / generalized epilepsy	Hypokalemic periodic paralysis 1		Musculoskeletal diseases / Neuromuscular diseases / Metabolic diseases				Dilated cardiomyopathy 1E		Cardiomyopathies	Indifference to pain, congenital, autosomal recessive		Peripheral nervous system diseases
		SMEI	Severe myoclonic epilepsy of infancy	Myoclonic epilepsies (Generalized epilepsies / Epileptic syndromes)				Hypokalemic periodic paralysis, type 2		Musculoskeletal diseases / Neuromuscular diseases / Metabolic diseases				LQTS3		Cardiac arrhythmias / Cardiac conduction system disease	Paroxysmal extreme pain disorder		Neurologic manifestations
								Paramyotonia congenita of von Eulenburg		Musculoskeletal diseases / Neuromuscular diseases				Paroxymal familial VF1		Cardiac arrhythmias	Primary erythromelalgia		Vascular diseases
								Potassium aggravated myotonia		Musculoskeletal diseases / Neurodegenerative diseases / Neuromuscular diseases				Progressive familial heart block type 1A		Cardiac arrhythmias / Cardiac conduction system disease	SMEI	Severe myoclonic epilepsy of infancy	Generalized epilepsy
														Sick sinus syndrome 1, autosomal recessive		Cardiac arrhythmias / Cardiac conduction system disease
														SUDDEN INFANT DEATH SYNDROME		Pathological processes
		scn1a			scn2a			scn4a			scn4b			scn5a			scn9a			kcnq2			kcnh2			ank3
MedGen	GENE NAMES*	10			7			18			3			16			12			6			3			2			TOTAL =	65	Phenotypes
	Homo sapiens	1			1			1			1			1			1			1			1			1			TOTAL =	9	Redirect to the gene
	#diseases	7			5			12			2			9			7			3			2			1			TOTAL =	48
		GEFS+2	Generalized epilepsy with febrile seizures plus	Febrile seizures / generalized epilepsy	BFNIS	Benign Familial Neonatal Infantile seizures	Benign neonatal epilepsy	Paramyotonia congenita of von Eulenburg		Musculoskeletal diseases / Neuromuscular diseases	LQTS10		Cardiac arrhythmias / Cardiac conduction system disease	BS1	Brugada Syndrome	Cardiac arrhythmias / Cardiac conduction system disease	SMEI	Severe myoclonic epilepsy of infancy	Generalized epilepsy	BFNS1	Benign Familial Neonatal Seizures	Benign neonatal epilepsy	LQTS2		Cardiac arrhythmias / Cardiac conduction system disease	Mental retardation, autosomal recessive 37			Neurobehavioral manifestations
		SMEI	Severe myoclonic epilepsy of infancy	Myoclonic epilepsies (Generalized epilepsies / Epileptic syndromes)	EIEE11	Early infantile epileptic encephalopathy	Infantile spasms (Generalized epilepsies / Epileptic syndromes)	HyperPP1		Musculoskeletal diseases / Neuromuscular diseases / Metabolic diseases	Familial AF1		Cardiac arrhythmias	Paroxysimal Familial VF1		Cardiac arrhythmias	GEFS+7	Generalized epilepsy with febrile seizures plus	Febrile seizures / generalized epilepsy	EIEE7	Early infantile epileptic encephalopathy	Infantile spasms (Generalized epilepsies / Epileptic syndromes)	SQTS1		Cardiac arrhythmias / Cardiac conduction system disease	1 DISCARDED
		FHM3	Familial hemiplegic migraine	Headache disorders	EIEE1	Early infantile epileptic encephalopathy	Infantile spasms (Generalized epilepsies / Epileptic syndromes)	HypoPP1		Musculoskeletal diseases / Neuromuscular diseases / Metabolic diseases	1 DISCARDED			LQTS3		Cardiac arrhythmias / Cardiac conduction system disease	Primary erythromelalgia		Vascular diseases	EIEE1	Early infantile epileptic encephalopathy	Infantile spasms (Generalized epilepsies / Epileptic syndromes)	1 DISCARDED
		GEFS+1	Generalized epilepsy with febrile seizures plus	Febrile seizures / generalized epilepsy	GEFS+	Generalized epilepsy with febrile seizures plus	Febrile seizures / generalized epilepsy	HypoPP2		Musculoskeletal diseases / Neuromuscular diseases / Metabolic diseases				Dilated cardiomyopathy 1E		Cardiomyopathies	Hereditary sensory and autonomic neuropathy type IIA		Neurodegenerative diseases / Peripheral nervous system diseases	3 DISCARDED
		MIGRAINE		Headache disorders	BFIS1 = BFIC 1	Benign Familial Infantile Seizures	Benign neonatal epilepsy	Congenital myasthenic syndrome, acetazolamide-responsive		Neuromuscular junction diseases				SUDDEN INFANT DEATH SYNDROME		Pathological processes	Indifference to pain, congenital, autosomal recessive		Peripheral nervous system diseases
		EIEE1	Early infantile epileptic encephalopathy	Infantile spasms (Generalized epilepsies / Epileptic syndromes)				Potassium aggravated myotonia		Musculoskeletal diseases / Neurodegenerative diseases / Neuromuscular diseases				Progressive familial heart block type 1A		Cardiac arrhythmias / Cardiac conduction system disease	Paroxysmal extreme pain disorder		Neurologic manifestations
		FFS1	Familial febrile seizures	Febrile seizures				Familial normokalemic periodic paralysis		Musculoskeletal diseases / Neuromuscular diseases / Metabolic diseases				Familial AF10		Cardiac arrhythmias	Familial FS1	Familial Febrile seizures	febrile seizures
		3 DISCARDED						Paramyotonia congenita		Musculoskeletal diseases / Neuromuscular diseases				Familial AF1		Cardiac arrhythmias	5 DISCARDED
								Acetazolamide responsive myotonia		Musculoskeletal diseases / Neurodegenerative diseases / Neuromuscular diseases				Sick sinus syndrome 1, autosomal recessive		Cardiac arrhythmias / Cardiac conduction system disease
								Potassium aggravated myotonia		Musculoskeletal diseases / Neurodegenerative diseases / Neuromuscular diseases				7 DISCARDED
								Paramyotonia Congenita without Cold Paralysis		Musculoskeletal diseases / Neuromuscular diseases
								Severe Neonatal Episodic Laryngospasm		Respiration disorder
								6 DISCARDED
OMIM+GEN+MEDGEN:		total different diseases=9			total different diseases=6			total different diseases=14			total different diseases=3			total different diseases=11			total different diseases=10			total different diseases=4			total different diseases=2			total different diseases=1			TOTAL =	60
*in lower case
**In OMIM they are implicitly human genes
*** Discarded = It means that a disease entry does not appear directly, but it redirects to other entries that can contain (or not) diseases related to the gen.
	Disease shared by the databases
	New disease appeared in this database
